# Supplementary material for: An Unusual Winter Ozone Event in Colorado
Source: Copernicus journal article supplement (doi:10.5194/egusphere-2024-1938), 2024-09-06
Supplement: Supplementary file 1 [file egusphere-2024-1938-supplement.pdf]

Supplementary Material for:

## **An Unusual Winter Ozone Event in Colorado**

Andrew O. Langford<sup>1</sup>, Raul J. Alvarez II<sup>1</sup>, Kenneth C. Aikin<sup>1,2</sup>, Sunil Baidar<sup>1,2</sup>, W. Alan Brewer<sup>1</sup>, Steven S. Brown<sup>1</sup>, Matthew M. Coggon<sup>1,2</sup>, Patrick D. Cullis<sup>2,3</sup>, Jessica B. Gilman<sup>1</sup>, Georgios I. Gkatzelis<sup>1,2\*</sup>, Detlev Helmig<sup>4</sup>, Bryan J. Johnson<sup>3</sup>, K. Emma Knowland<sup>5,6</sup>, Rajesh Kumar<sup>7</sup>, Aaron D. Lamplugh<sup>1,2\*\*</sup>, Audra McClure-Begley<sup>2,3</sup>, Brandi J. McCarty<sup>1,2</sup>, Ann M. Middlebrook<sup>1</sup>, Gabriele Pfister<sup>8</sup>, Jeff Peischl<sup>1,2,3</sup>, Irina Petropavlovskikh<sup>2,3</sup>, Pamela S. Rickly<sup>1,2\*\*</sup>, Andrew W. Rollins<sup>1</sup>, Scott P. Sandberg<sup>1</sup>, Christoph J. Senff<sup>1,2</sup>, Carsten Warneke<sup>1</sup>

<sup>1</sup>NOAA Chemical Sciences Laboratory, Boulder, CO 80305, USA.

<sup>2</sup>Cooperative Institute for Research in Environmental Sciences, University of Colorado, Boulder, CO, 80309, USA.

<sup>3</sup>NOAA Global Monitoring Laboratory, Boulder, CO 80305, USA.

<sup>4</sup>Boulder Air LLC, Boulder, Colorado, 80301, USA.

<sup>5</sup>Morgan State University, GESTAR-II, Baltimore, MD, 21251, USA.

<sup>6</sup>NASA Goddard Space Flight Center, Global Modeling and Assimilation Office, Greenbelt, MD, USA.

<sup>7</sup>NSF NCAR Research Applications Laboratory, Boulder, CO, USA, 80307, USA.

<sup>8</sup>NSF NCAR Atmospheric Chemistry Observations and Modeling Laboratory, Boulder, CO, USA, 80307, USA.

\*Now at Institute of Energy and Climate Research, IEK-8: Troposphere, Forschungszentrum Jülich GmbH, Jülich, Germany.

\*\* Now at Air Pollution Control Division, Colorado Department of Public Health and Environment, Denver, CO, 80246, USA.

Correspondence to: Andrew O. Langford ([andrew.o.langford@noaa.gov](mailto:andrew.o.langford@noaa.gov))

## 1 Surface Ozone Measurements

Our analysis is based in part on measurements (Table S1) made by the Air Pollution Control Division (APCD of the Colorado Department of Public Health and Environment (CDPHE)), which maintains a network of O<sub>3</sub> monitors to meet the requirements of the U.S. Clean Air Act and the U.S. Environmental Protection Agency (EPA). These regulatory monitors are subject to stringent standards with the monitor siting determined primarily by population distributions. These data are reported to the EPA Air Quality System (AQS) and are available to the public (<https://www.epa.gov/aqs>). The U.S. National Park Service (NPS) also maintains O<sub>3</sub> monitors at most of the National Parks (<https://www.nps.gov/subjects/air/current-data.htm>) including the Long's Peak monitor at Rocky Mountain National Park. These regulatory monitors also report to the EPA AQS.

The NOAA Global Monitoring Laboratory (GML) also makes routine non-regulatory measurements at a number of locations worldwide. These non-regulatory measurements are not reported to the AQS, but are available online (<https://gml.noaa.gov/ozwv/>). The NOAA Chemical Sciences Laboratory (CSL) also makes non-routine O<sub>3</sub> measurements to support various field campaigns as well as semi-regular measurements in Boulder to support the TOPAZ lidar operations (<https://csl.noaa.gov/groups/csl3/measurements/2018boulder/2020.php>).

Finally, Boulder A.I.R. maintains a small network of O<sub>3</sub> monitors under contract with local governments in the Denver-Boulder area. These measurements are available at: <https://www.bouldair.com/>.

**Table S1:** Regulatory and non-regulatory ozone monitors used in the study.

| Name                         | Abbrev. | AQS      | Lat.   | Lon.     | Elev. (m) | Agency |
|------------------------------|---------|----------|--------|----------|-----------|--------|
| Ft Collins-West              | FTCW    | 80690011 | 40.593 | -105.141 | 1571      | CDPHE  |
| Ft Collins                   | FTC     | 80691004 | 40.577 | -105.079 | 1525      | CDPHE  |
| Greeley                      | GRET    | 81230009 | 40.386 | -104.737 | 1484      | CDPHE  |
| Rocky Mt NP<br>(Long's Peak) | RMNP    | 80690007 | 40.278 | -105.546 | 2748      | NPS    |
| Union<br>Reservoir           | LUR     | N/A      | 40.176 | -105.048 | 1514      | A.I.R. |
| Longmont<br>Airport          | LMA     | N/A      | 40.164 | -105.163 | 1540      | A.I.R. |
| Table Mountain               | BOS     | N/A      | 40.125 | -105.237 | 1691      | NOAA   |
| Boulder Res.                 | BOUR    | 80130014 | 40.070 | -105.220 | 1585      | CDPHE  |
| Niwot Ridge                  | NWR     | N/A      | 40.036 | -105.544 | 3026      | NOAA   |
| DSRC                         | DSRC    | N/A      | 39.991 | -105.264 | 1672      | NOAA   |
| Rocky Flats-<br>North        | RFN     | 80590006 | 39.913 | -105.189 | 1803      | CDPHE  |
| Welby                        | WBY     | 80013001 | 39.838 | -104.950 | 1556      | CDPHE  |
| Blackhawk                    | BHWK    | 80470003 | 39.793 | -105.491 | 2635      | CDPHE  |
| La Casa                      | CASA    | 80310026 | 39.779 | -105.005 | 1602      | CDPHE  |
| Camp                         | CAMP    | 80310002 | 39.751 | -104.988 | 1593      | CDPHE  |
| National<br>Renewable        | NREL    | 80590011 | 39.743 | -105.179 | 1833      | CDPHE  |
| Welch                        | WCH     | 80590005 | 39.639 | -105.139 | 1744      | CDPHE  |
| Aurora East                  | AURE    | 80050006 | 39.639 | -104.569 | 1795      | CDPHE  |
| Highland<br>Reservoir        | HLD     | 80050002 | 39.568 | -104.957 | 1746      | CDPHE  |
| Chatfield State<br>Park      | CHAT    | 80350004 | 39.534 | -105.070 | 1676      | CDPHE  |

## 2 NOAA DSRC Measurements

The NOAA chemical Sciences Laboratory conducted a large suite of *in-situ* measurements at the NOAA David Skaggs Research Center (DSRC) in Boulder, CO between 30 March and 31 August of 2020 to study changes in emissions within the Colorado Front Range urban area as a result of the COVID-19 lockdown. Ambient air was sampled either from the roof of the building or window ports. Additional details about these measurements can be found in Rickly et al. (2022).

NO and NO<sub>2</sub> and total NO<sub>x</sub> were measured using a Thermo Scientific Model 42i NO-NO<sub>2</sub>-NO<sub>x</sub> Analyzer with a molybdenum converter and CO, N<sub>2</sub>O, and H<sub>2</sub>O were measured using a modified Los Gatos Research infrared laser off-axis integrated-cavity-output spectrometer (OA-ICOS). CO<sub>2</sub> and CH<sub>4</sub> were measured with a Picarro 1301-m cavity ringdown spectrometer. The VOC measurements were conducted by gas chromatography mass spectrometry (GC-MS) (Lerner et al., 2017) and proton transfer reaction time-of-flight mass spectrometry (PTR-ToF-MS) (Yuan et al., 2016). The GC-MS technique uses an integrated whole air sampler (iWAS) based on Stirling coolers to cryogenically trap and preconcentrate analytes for an interval of 20-minutes to attain a detection limit <1 ppt and 1σ uncertainty <10% with isomer separation for a wide suite of C2 to C10 organic compounds (Lerner et al., 2017). The PTR-ToF-MS measures a wide range of polar and unsaturated primary and secondary VOC species with a proton affinity greater than water using a chemical ionization mass spectrometer exploiting H<sub>3</sub>O<sup>+</sup> reagent ions. The PTR-ToF-MS operates at 1 Hz with a detection limit of 10–100 parts-per-trillion by volume (pptv) depending on the species.

The number, volume, and surface area of the fine particulate mass was measured using an Ultra-High Sensitivity Aerosol Spectrometer (UHSAS) from Droplet Measurement Techniques (DMT) (Kupc et al., 2018). This optical counter is sensitive to particles with diameters between 0.08 and 0.7 μm.

Finally, surface O<sub>3</sub> was measured with a commercial UV absorption monitor (2B Technologies model 205) that continuously sampled air 5 m a.g.l. at the TOPAZ truck. The truck was also equipped with an automated weather station (Airmar 150WX) to measure meteorological parameters (Langford et al., 2022).

## 3 Boulder A.I.R. Measurements

Boulder A.I.R. maintains several air quality monitoring stations in the Boulder-Denver area. These include the Longmont Municipal Airport (LMA) and Longmont Union Reservoir (LUR) locations used in this study. The primary LUR station maintains a large suite of measurements including NO, NO<sub>2</sub>, O<sub>3</sub>, CH<sub>4</sub>, CO<sub>2</sub>, and about 20 VOCs, as well as meteorological parameters. The LMA station, since relocated, measured O<sub>3</sub>. Boulder A.I.R. also measured a suite of VOCs and at the CDPHE station at the Boulder Reservoir (BOUR) (Pollack et al., 2021). A continuous live feed of the measurements from the currently active stations is publicly available online at <https://www.bouldair.com/>.

The LUR measurements ambient air sampled from a height of 8.6 m above the surface. Ozone was measured with a Thermo Fisher Scientific model 49C UV absorption monitor and CO<sub>2</sub> and CH<sub>4</sub> were measured using a Picarro G2301 cavity ring down spectrometer that was periodically calibrated using a Thermo Fisher Scientific 146i Multi-gas Calibrator. NO and NO<sub>2</sub> were monitored with a Teledyne Model API T200UP chemiluminescence analyzer that uses a photolytic converter for the NO<sub>2</sub> determination. Approximately twenty VOCs were routinely quantified.

The LUR station also operates a GRIMM EDM180 monitor to measure particulate matter (PM) using a laser scattering technique. This analyzer measures particles in the 0.25 – 32 μm (micrometer) size range with two size ranges reported: PM<sub>10</sub> (coarse particles) for all particle mass smaller than 10 μm, and PM<sub>2.5</sub> (fine particles) for all particle mass smaller than 2.5 μm.

Solar radiation was monitored with an Apogee SP-110-SS pyranometer mounted on the meteorological tower at 9.1 m height above the surface and wind conditions were recorded with an RM Young Wind Monitor AQ, 05305-PT, mounted on the meteorological tower at 9.2 m. Temperature and relative humidity are measured with a Campbell Scientific CS215-L50-PT probe housed inside a RM Young 6-Plate Solar Radiation Shield mounted on the meteorological tower at 9.1 m height above the surface using the factory calibration.

Additional details are available at <https://www.bouldair.com/longmont.htm>.

## References

- Kupc, A., Williamson, C., Wagner, N. L., Richardson, M., and Brock, C. A.: Modification, calibration, and performance of the Ultra-High Sensitivity Aerosol Spectrometer for particle size distribution and volatility measurements during the Atmospheric Tomography Mission (ATom) airborne campaign, *Atmos. Meas. Tech.*, 11, 369-383, 10.5194/amt-11-369-2018, 2018.
- Langford, A. O., Senff, C. J., Alvarez li, R. J., Aikin, K. C., Baidar, S., Bonin, T. A., Brewer, W. A., Brioude, J., Brown, S. S., Burley, J. D., Caputi, D. J., Conley, S. A., Cullis, P. D., Decker, Z. C. J., Evan, S., Kirgis, G., Lin, M., Pagowski, M., Peischl, J., Petropavlovskikh, I., Pierce, R. B., Ryerson, T. B., Sandberg, S. P., Sterling, C. W., Weickmann, A. M., and Zhang, L.: The Fires, Asian, and Stratospheric Transport–Las Vegas Ozone Study (FAST-LVOS), *Atmos. Chem. Phys.*, 22, 1707-1737, 10.5194/acp-22-1707-2022, 2022.
- Lerner, B. M., Gilman, J. B., Aikin, K. C., Atlas, E. L., Goldan, P. D., Graus, M., Hendershot, R., Isaacman-VanWertz, G. A., Koss, A., Kuster, W. C., Lueb, R. A., McLaughlin, R. J., Peischl, J., Sueper, D., Ryerson, T. B., Tokarek, T. W., Warneke, C., Yuan, B., and de Gouw, J. A.: An improved, automated whole air sampler and gas chromatography mass spectrometry analysis system for volatile organic compounds in the atmosphere, *Atmos Meas Tech*, 10, 291-313, 10.5194/amt-10-291-2017, 2017.

Pollack, I. B., Helmig, D., O'Dell, K., and Fischer, E. V.: Seasonality and Source Apportionment of Nonmethane Volatile Organic Compounds at Boulder Reservoir, Colorado, Between 2017 and 2019, *J. Geophys. Res.-Atmos.*, 126, ARTN e2020JD034234 10.1029/2020JD034234, 2021.

Yuan, B., Koss, A., Warneke, C., Gilman, J. B., Lerner, B. M., Stark, H., and de Gouw, J. A.: A high-resolution time-of-flight chemical ionization mass spectrometer utilizing hydronium ions (H<sub>3</sub>O<sup>+</sup> ToF-CIMS) for measurements of volatile organic compounds in the atmosphere, *Atmos Meas Tech*, 9, 2735-2752, 10.5194/amt-9-2735-2016, 2016.
